# Supplementary material for: Introducing carbon dots to NiFe LDH via a mild coprecipitation–aging method to construct a heterojunction for effective oxygen evolution
Source: Royal Society of Chemistry journal article supplement (doi:10.1039/d3cy01621h), 2023-12-14
Supplement: d3cy01621h1.pdf [file d3cy01621h1.pdf]

## Supplementary Materials

*Introducing carbon dots to NiFe LDH via mild coprecipitation-ageing method to construct heterojunction for effective oxygen evolution*

*Zi-Ye Liu, Qian-Yu Wang, Ji-Ming Hu\**

Department of Chemistry, Zhejiang University, Hangzhou 310027, P. R. China

\*: Corresponding author. E-mail: [kejmhu@zju.edu.cn](mailto:kejmhu@zju.edu.cn). Tel: +86-571-87953297. Fax:  
+86-571-87951895.

## Supplementary datas

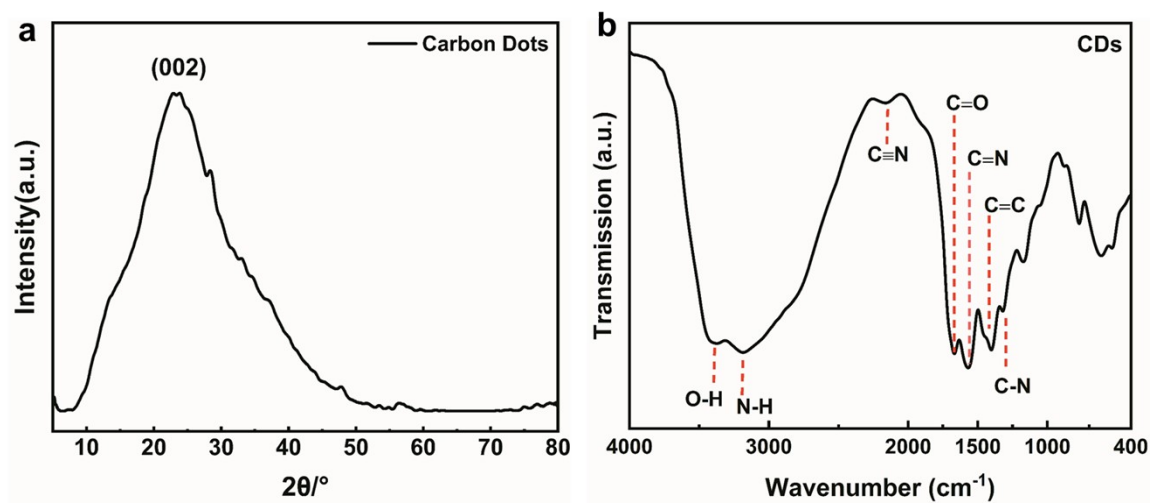

Fig. S1. (a) FTIR spectrum and (b) XRD pattern and of carbon dots

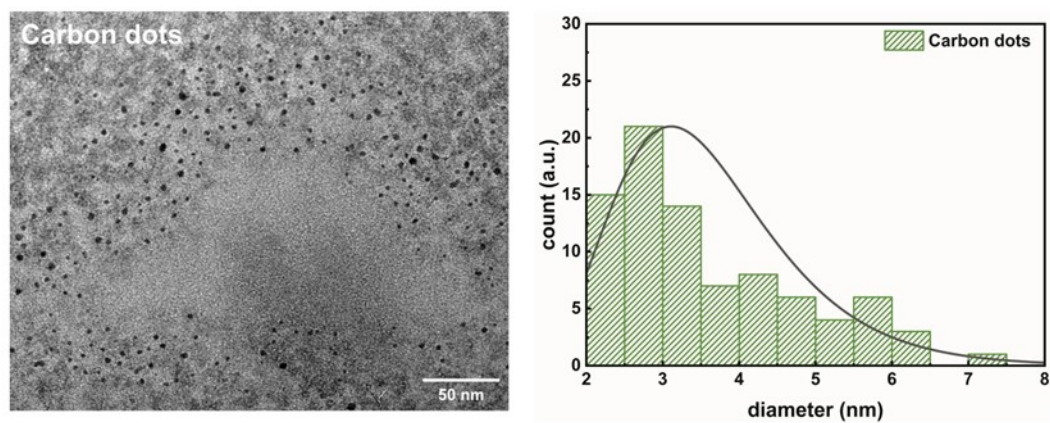

Fig. S2. TEM images and particle size distribution diagram of carbon dots.

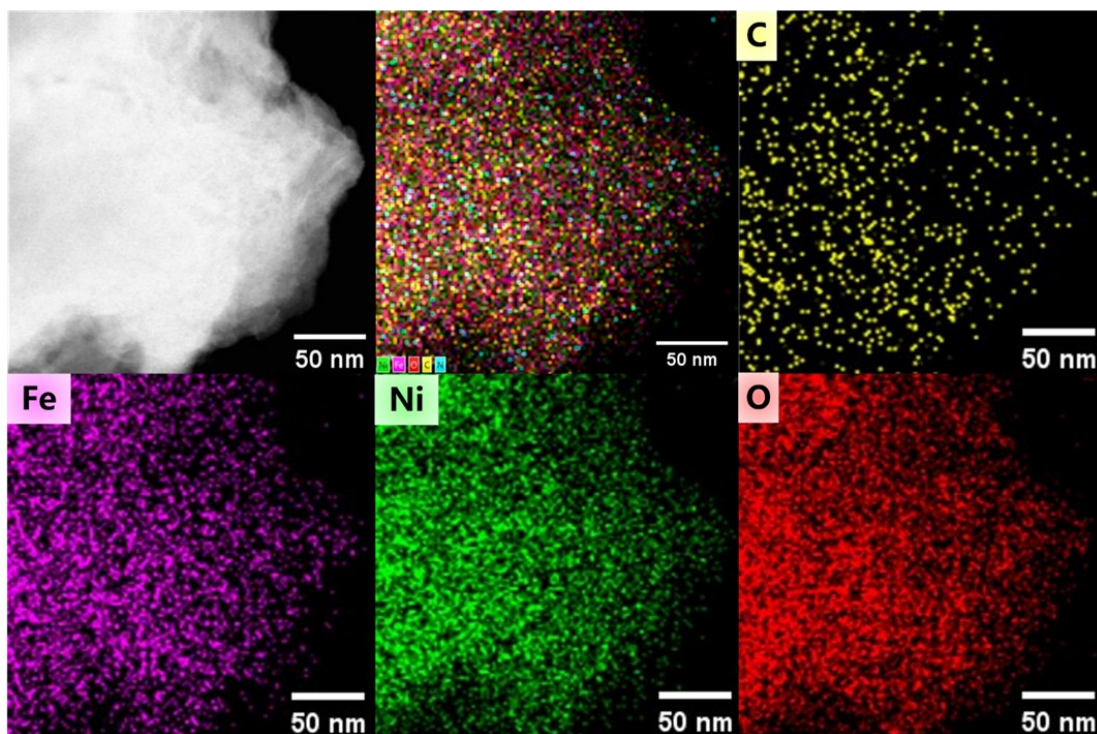

**Fig. S3.** Element mapping images of NiFe LDH

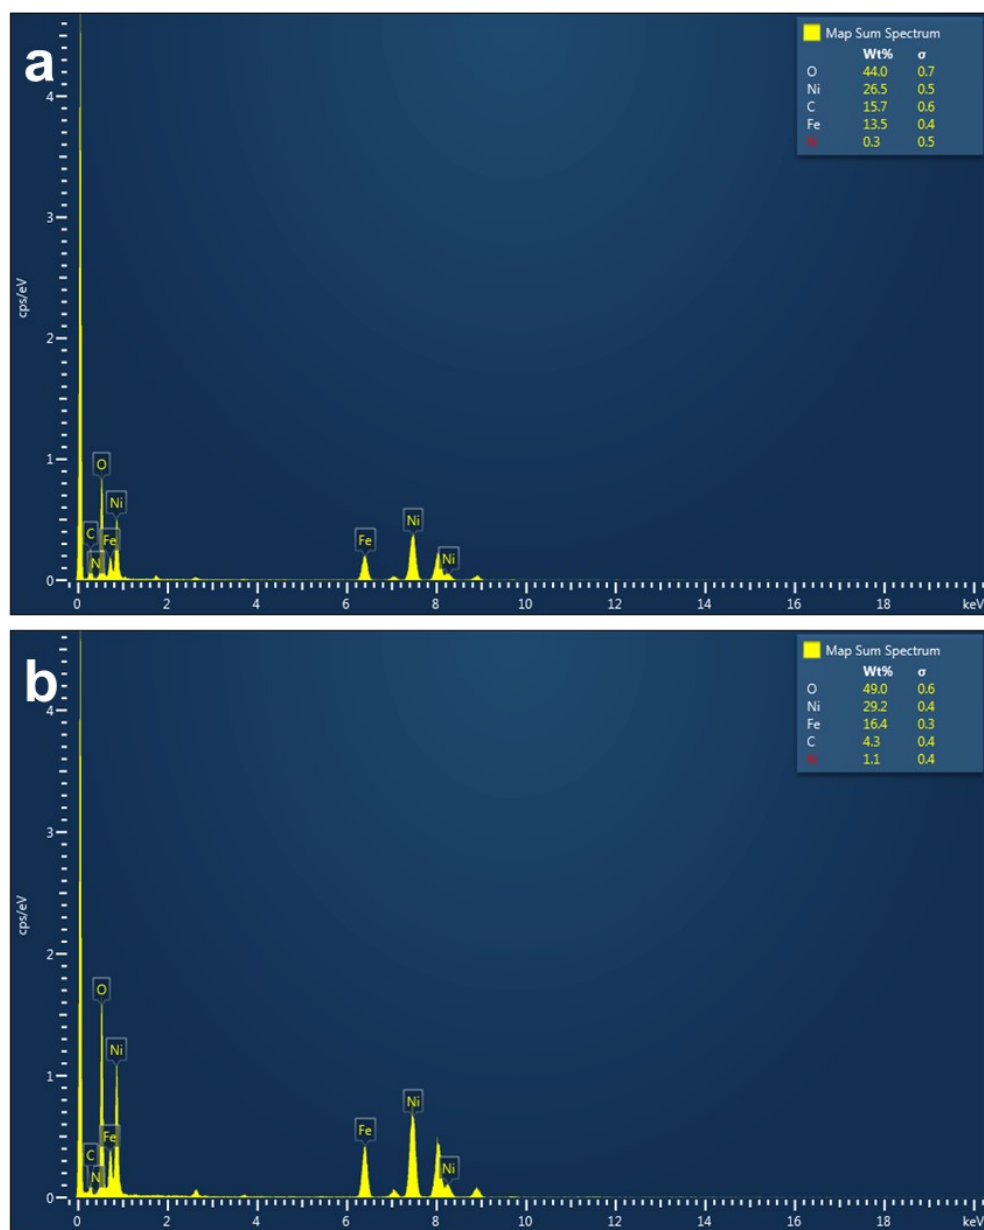

**Fig. S4.** EDS spectra of (a) NiFe LDH and (b) NiFe LDH@CDS-200.

**Tab. S1.** Elemental analysis of NiFe LDH, NiFe LDH@CDs-50, NiFe LDH@CDs-100, NiFe LDH@CDs-200 and carbon dots

| Name             | Weight [mg] | N [%] | C [%] | H [%] |
|------------------|-------------|-------|-------|-------|
| NiFe LDH         | 1.887       | 0.34  | 1.58  | 3.26  |
| NiFe LDH         | 1.937       | 0.47  | 1.56  | 3.13  |
| NiFe LDH@CDs-50  | 1.986       | 0.65  | 2.37  | 2.97  |
| NiFe LDH@CDs-50  | 1.859       | 0.65  | 2.36  | 2.93  |
| NiFe LDH@CDs-100 | 1.988       | 0.34  | 2.67  | 3.03  |
| NiFe LDH@CDs-100 | 1.918       | 0.36  | 2.64  | 3.02  |
| NiFe LDH@CDs-200 | 1.851       | 0.22  | 3.11  | 3.10  |
| NiFe LDH@CDs-200 | 1.857       | 0.23  | 3.14  | 3.08  |
| CDs              | 1.979       | 21.22 | 36.95 | 6.23  |
| CDs              | 1.960       | 20.95 | 36.58 | 6.38  |

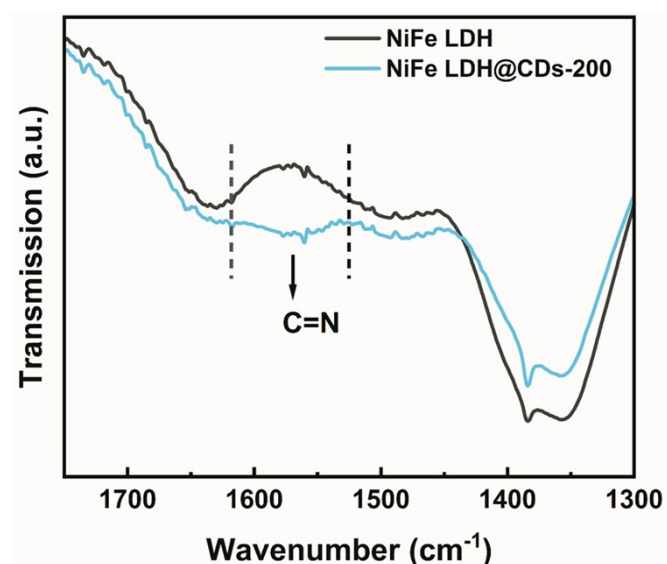

**Fig. S5.** FTIR spectra of NiFe LDH and NiFe LDH@CDs-200 ranging from 1300  $\text{cm}^{-1}$  to 1730  $\text{cm}^{-1}$ .

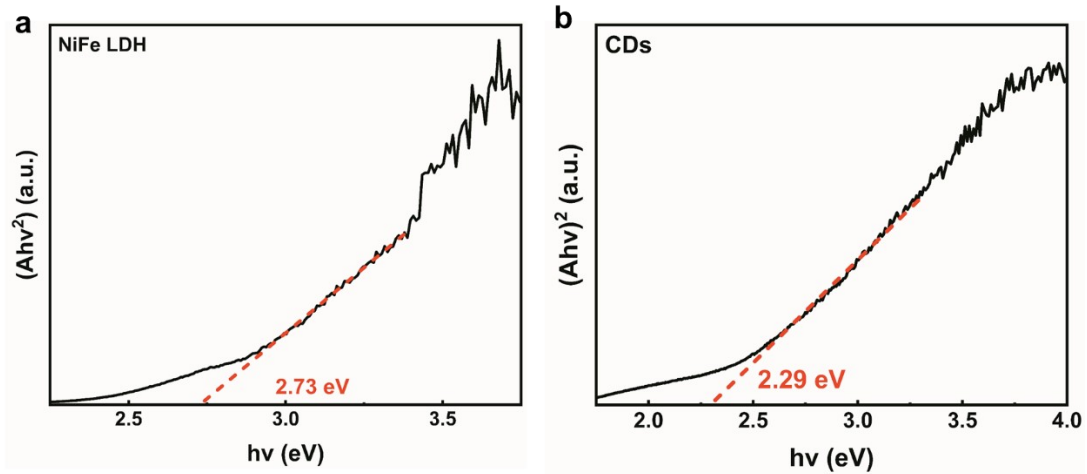

Fig. S6. Tauc plots of (a) NiFe LDH and (b) carbon dots.

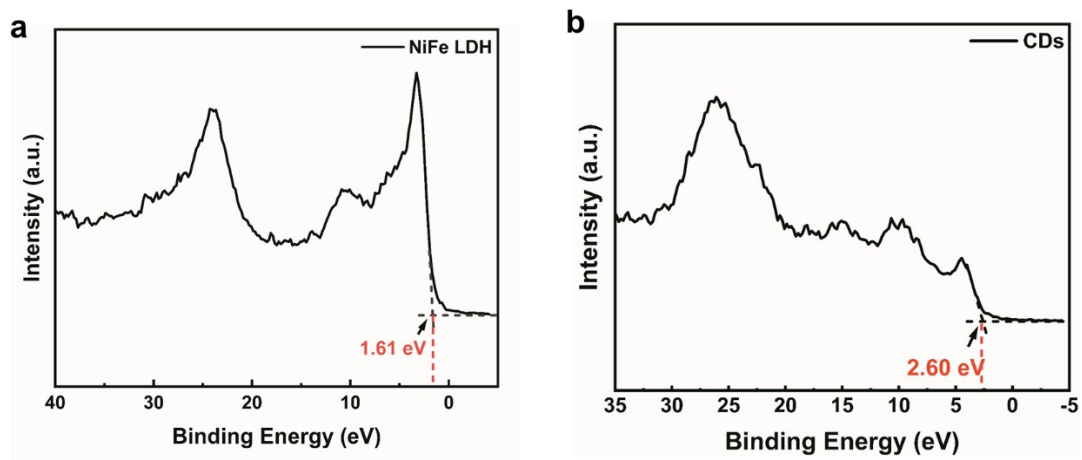

Fig. S7. VB-XPS spectra of (a) NiFe LDH and (b) carbon dots.

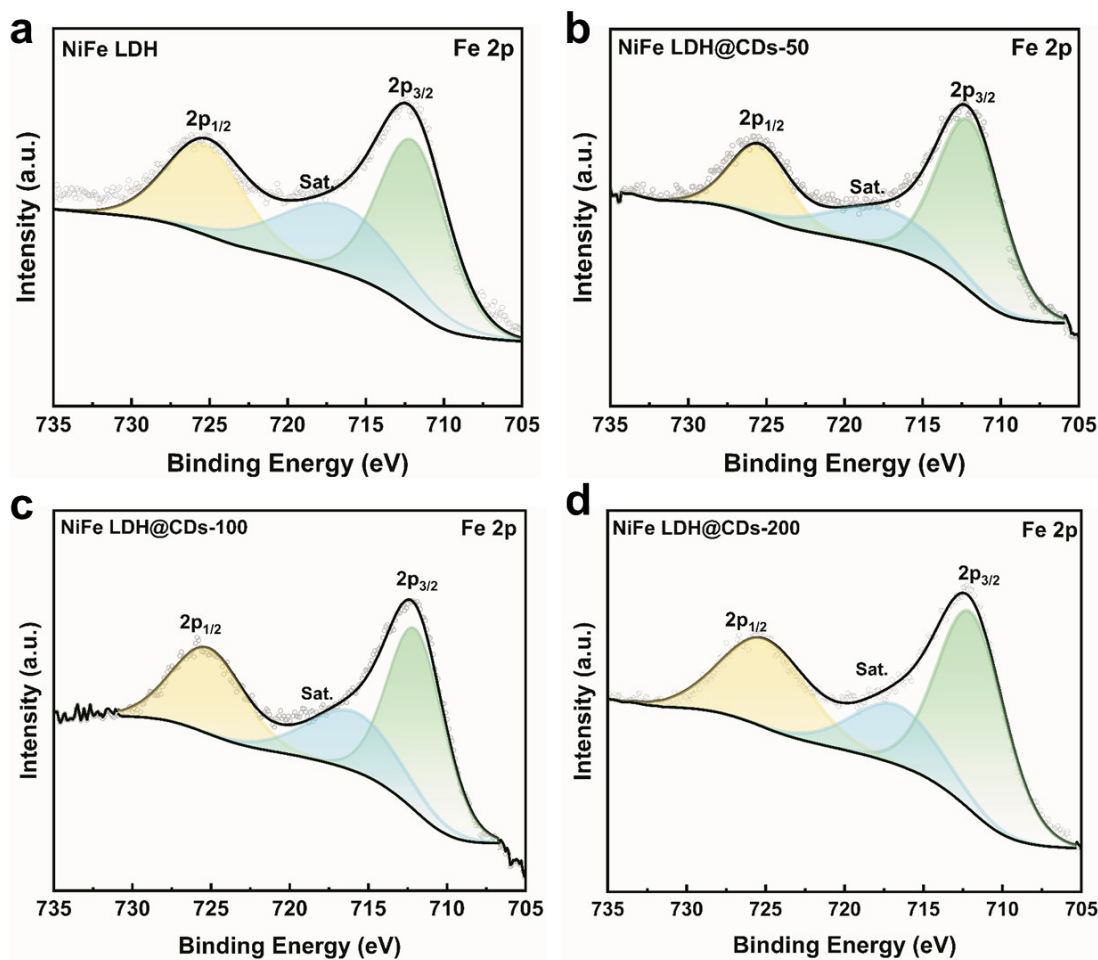

Fig. S8. Fe 2p XPS spectra of NiFe LDH (a), NiFe LDH@CDs-50 (b), NiFe LDH@CDs-100 (c) and NiFe LDH@CDs-200(d).

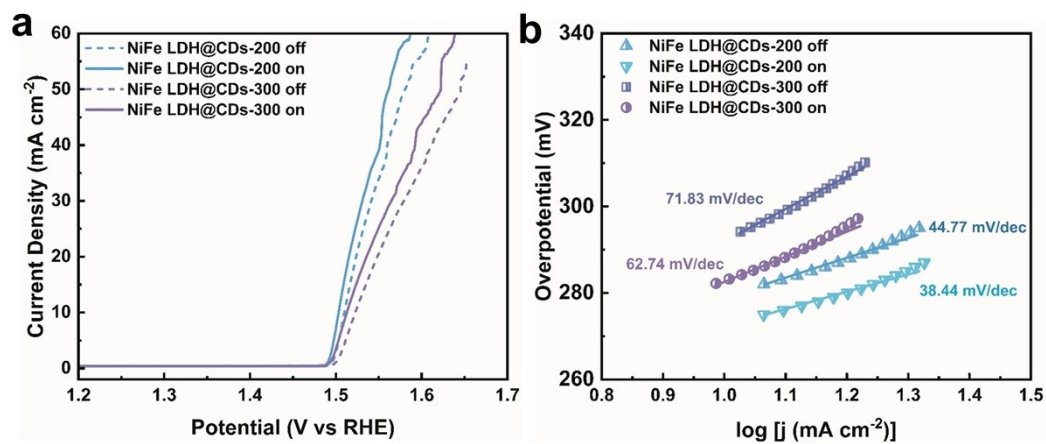

Fig. S9. OER LSV curves (a) and Tafel plots (b) of NiFe LDH@CDs-200 and NiFe LDH@CDs-300 in 1 M KOH with 95% iR-compensation.

**Tab. S2.** Summary of the overpotential and Tafel slope of Ni-based LDH catalysts

| Catalysts                                  | Electrode        | Overpotential<br>(10 mA cm <sup>-2</sup> ) | Overpotential<br>(25 mA cm <sup>-2</sup> )* | Tafel slope<br>(mV dec <sup>-1</sup> ) | Electrolyte | Referen<br>ce |
|--------------------------------------------|------------------|--------------------------------------------|---------------------------------------------|----------------------------------------|-------------|---------------|
| NiFe<br>LDH@CDs-<br>200                    | Glassy<br>carbon | 279 mV                                     | 303 mV                                      | 44.77                                  | 1 M KOH     | This work     |
|                                            |                  | 273 mV<br>(light on)                       | 291 mV<br>(light on)                        | 38.44<br>(light on)                    |             |               |
| CoNi LDH                                   | Glassy<br>carbon | 270 mV                                     | ~293 mV                                     | 48.7                                   | 1 M KOH     | [1]           |
| Nanopore-<br>rich NiFe<br>LDH              | Glassy<br>carbon | 278 mV                                     | -                                           | 75                                     | 1 M KOH     | [2]           |
| Fe-doped<br>NiCo LDH                       | Glassy<br>carbon | 260 mV                                     | ~310 mV                                     | 70                                     | 1 M KOH     | [3]           |
| Ru-doped<br>NiFe LDH                       | Glassy<br>carbon | 246 mV                                     | ~305 mV                                     | 67.2                                   | 1 M KOH     | [4]           |
| NiFeCo<br>LDH/<br>Carbon Fiber             | Glassy<br>carbon | 249 mV                                     | ~275 mV                                     | 42                                     | 1 M KOH     | [5]           |
| u-Ni <sub>70</sub> Fe <sub>30</sub><br>LDH | Copper<br>foil   | 260 mV                                     | ~310 mV                                     | 55.6                                   | 1 M KOH     | [6]           |
| r-NiFe LDH                                 | Nickle<br>foam   | 320 mV<br>(20 mA cm <sup>-2</sup> )        | ~335 mV                                     | 80                                     | 1 M KOH     | [7]           |
| CQDs/NiFe<br>LDH                           | Glassy<br>carbon | 235 mV                                     | ~255 mV                                     | 30                                     | 1 M KOH     | [8]           |
| NCD@NiFe<br>LDH                            | Carbon<br>cloth  | 252 mV                                     | -                                           | 49.8                                   | 1 M KOH     | [9]           |
| NiCo<br>LDH/Mxene<br>quantum dots          | Glassy<br>carbon | 316 mV                                     | ~360 mV                                     | 79                                     | 1 M KOH     | [10]          |
| N-<br>GQDs/NiFe<br>LDH                     | Glassy<br>carbon | 279 mV<br>(20 mA cm <sup>-2</sup> )        | ~295 mV                                     | 47                                     | 1 M KOH     | [11]          |
| NiFe<br>LDH/Co <sub>3</sub> O <sub>4</sub> | Nickle<br>foam   | 190 mV                                     | ~205 mV                                     | 34.6                                   | 1 M KOH     | [12]          |

\*: The estimated value directly calculated from the LSV curve



**Tab. S3.** Detail information about EIS fitting data

|                       | NiFe LDH                | NiFe LDH@CDs-50         | NiFe LDH@CDs-100        | NiFe LDH@CDs-200        |
|-----------------------|-------------------------|-------------------------|-------------------------|-------------------------|
| <b>R<sub>s</sub></b>  | 4.292 $\Omega$          | 4.55 $\Omega$           | 4.185 $\Omega$          | 4.606 $\Omega$          |
| <b>R<sub>if</sub></b> | 20.12 $\Omega$          | 13.54 $\Omega$          | 13.33 $\Omega$          | 11.89 $\Omega$          |
| <b>CPE1-T</b>         | $3.3635 \times 10^{-5}$ | $2.2888 \times 10^{-5}$ | $1.2218 \times 10^{-5}$ | $2.7686 \times 10^{-5}$ |
| <b>CPE1-P</b>         | 0.8002                  | 0.81410                 | 0.88957                 | 0.774                   |
| <b>R<sub>ct</sub></b> | 25.70 $\Omega$          | 19.80 $\Omega$          | 17.43 $\Omega$          | 15.90 $\Omega$          |
| <b>CPE2-T</b>         | $6.6556 \times 10^{-4}$ | $3.0499 \times 10^{-4}$ | $8.0759 \times 10^{-5}$ | $2.5746 \times 10^{-4}$ |
| <b>CPE2-P</b>         | 0.83995                 | 0.90163                 | 0.8582                  | 0.8199                  |

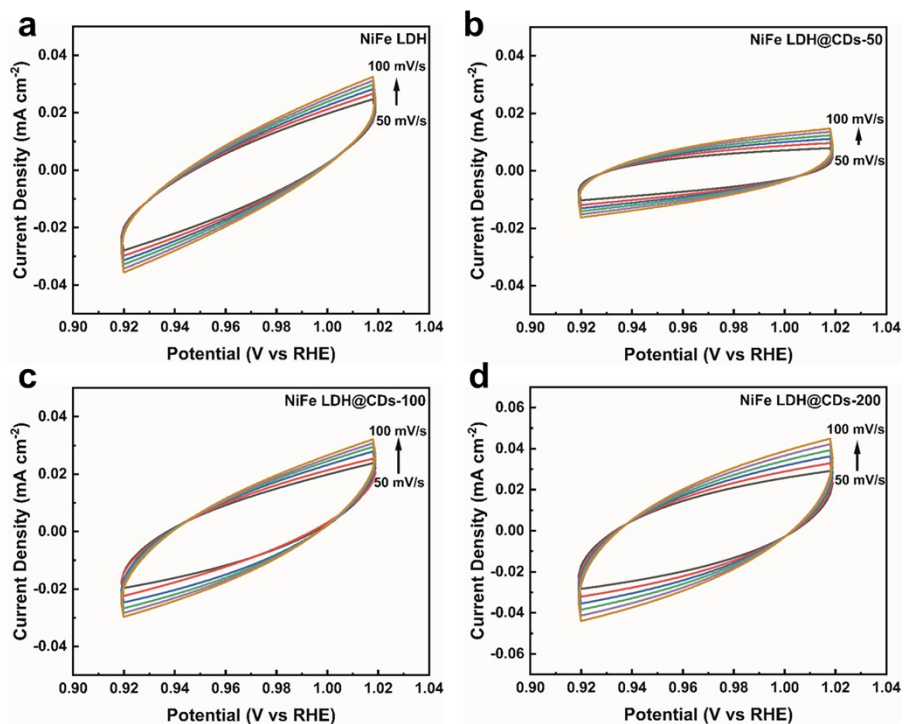

**Figure S10** . CV curves with a gradient scan rate of NiFe LDH (a), NiFe LDH@CDs-50 (b), NiFe LDH@CDs-100 (c) and NiFe LDH@CDs-200 (d) in the region of 0.918 ~ 1.018 V vs RHE.

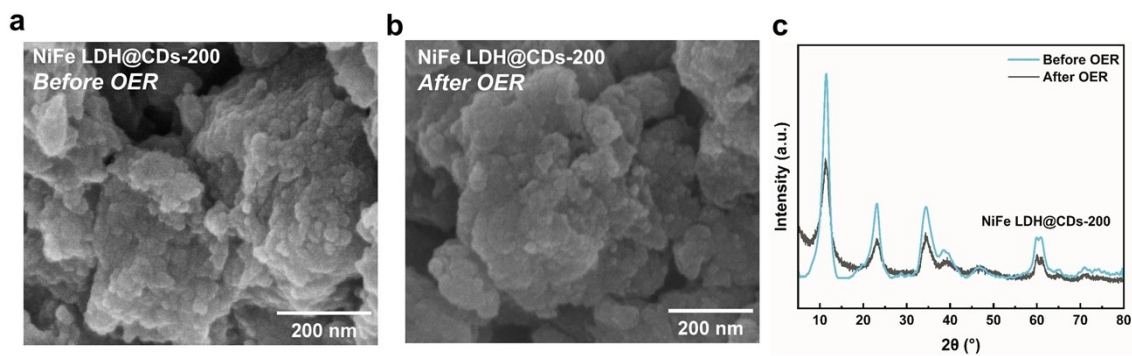

**Figure S11**. SEM images of NiFe LDH@CDs-200 before (a) and after (b) OER at  $10 \text{ mA cm}^{-2}$  for 6 h . (c) XRD patterns of NiFe LDH@CDs-200 before and after OER process.

## Reference

1. Y. Ma, K. Wang, Y. Chen, X. Yang, S. Zhao, K. Xi, S. Xie, S. Ding and C. Xiao, *Int. J. Hydrogen Energy*, 2019, **44**, 20085-20092.
2. Q. Wen, S. Wang, R. Wang, D. Huang, J. Fang, Y. Liu and T. Zhai, *Nano Res.* 2023, **16**, 2286-2293.
3. Y. Shi, J. Li, B. Zhang, S. Lv, T. Wang and X. Liu, *Appl. Surf. Sci.*, 2021, **565**, 150506
4. Y. Yang, W. Wang, Y. Yang, P. Guo, B. Zhu, K. Wang, W. Wang, Z. He and Z. Liu, *J. Electrochem. Soc.*, 2022, **169**, 024503.
5. Y. Lin, H. Wang, C. Peng, L. Bu, C. Chiang, K. Tian, Y. Zhao, J. Zhao, Y.G. Lin, J. Lee and L. Gao, *Small*, 2020, **16**, e2002426.
6. H. Yang, S. Luo, Y. Bao, Y. Luo, J. Jin and J. Ma, *Inorg. Chem. Front.*, 2017, **4**, 1173-1181.
7. X. Hou, J. Li, J. Zheng, L. Li and W. Chu, *Dalton Trans.*, 2022, **51**, 13970-13977.
8. D. Tang, J. Liu, X. Wu, R. Liu, X. Han, Y. Han, H. Huang, Y. Liu, Z. Kang, *ACS Appl. Mater. Interfaces*, 2014, **6**, 7918-7925.
9. Z. Hu, D. Zhang, C. Sun, C. Song and D. Wang, *Electrochim. Acta*, 2021, **391**, 138932.
10. L. Song, X. Zhang, X. Du, S. Zhu, Y. Xu and Y. Wang, *Phys. Chem. Chem. Phys.*, 2022, **24**, 24902-24909.
11. Q. Dong, C. Shuai, Z. Mo, Z. Liu, G. Liu, J. Wang, Y. Chen, W. Liu, N. Liu and R. Guo, *New J. Chem.*, 2020, **44**, 17744-17752.
12. J. Lv, L. Wang, R. Li, K. Zhang, D. Zhao, Y. Li, X. Li, X. Huang and G. Wang, *ACS Catal.*, 2021, **11**, 14338-14351.
